# Supplementary material for: Paradoxical Psoriasis Induced by Anti-TNFα Treatment: Evaluation of Disease-Specific Clinical and Genetic Markers
Source: MDPI journal article supplement (doi:10.3390/ijms21217873), 2020-10-23
Supplement: s1 [file s1]

## SUPPLEMENTARY TABLES

**Table S1:** Clinical-pathologic characteristics of IBD and psoriatic patients with PP treated with Adalimumab.

| Characteristics <sup>a</sup>                                                                                                              | IBD patients with PP<br>(n=11) | Psoriatic patients with PP<br>(n=23) | <i>p value</i> * |
|-------------------------------------------------------------------------------------------------------------------------------------------|--------------------------------|--------------------------------------|------------------|
| <b>Sex</b>                                                                                                                                |                                |                                      |                  |
| Male                                                                                                                                      | 3 (27.3%)                      | 9 (39.1%)                            |                  |
| Female                                                                                                                                    | 8 (72.7%)                      | 14 (60.9%)                           | 0.06             |
| <b>Number of psoriatic lesion locations</b>                                                                                               |                                |                                      |                  |
| 1                                                                                                                                         | 1 (9.1%)                       | 14 (73.7%)                           |                  |
| 2                                                                                                                                         | 3 (27.3%)                      | 2 (10.5%)                            |                  |
| 3 or more                                                                                                                                 | 7 (63.6%)                      | 3 (15.8%)                            | <b>0.003</b>     |
| <b>Psoriatic lesions locations</b>                                                                                                        |                                |                                      |                  |
| Lower limbs                                                                                                                               | 3 (9.7%)                       | 5 (18.5%)                            |                  |
| Upper limbs                                                                                                                               | 1 (3.2%)                       | 3 (11.1%)                            |                  |
| Armpits                                                                                                                                   | 4 (12.9%)                      | 0 (0.0%)                             |                  |
| Nipple                                                                                                                                    | 1 (3.2%)                       | 0 (0.0%)                             |                  |
| Scalp                                                                                                                                     | 8 (25.8%)                      | 1 (3.7%)                             |                  |
| Genitals                                                                                                                                  | 4 (12.9%)                      | 2 (7.4%)                             |                  |
| Hands                                                                                                                                     | 0 (0.0%)                       | 4 (14.8%)                            |                  |
| Umbilicus                                                                                                                                 | 3 (9.7%)                       | 0 (0.0%)                             |                  |
| Retroauricular                                                                                                                            | 4 (12.9%)                      | 3 (11.1%)                            |                  |
| Back                                                                                                                                      | 1 (3.2%)                       | 2 (7.4%)                             |                  |
| Trunk                                                                                                                                     | 1 (3.2%)                       | 2 (7.4%)                             |                  |
| Nails                                                                                                                                     | 0 (0.0%)                       | 1 (3.7%)                             |                  |
| Face                                                                                                                                      | 1 (3.2%)                       | 2 (7.4%)                             |                  |
| Suberitrodermic<br>(diffuse cutaneous involvement)                                                                                        | 0 (0.0%)                       | 2 (7.4%)                             | <b>0.04</b>      |
| <b>Pruritus</b>                                                                                                                           |                                |                                      |                  |
| No                                                                                                                                        | 6 (50.0%)                      | 4 (18.2%)                            |                  |
| Yes                                                                                                                                       | 6 (50.0%)                      | 18 (81.8%)                           | 0.05             |
| <b>Number of months from the<br/>beginning of therapy to the<br/>development of the paradoxical<br/>effect</b><br>(Mean ± standard error) | 9 (± 1.9)                      | 40.8 (±8.3)                          | <b>0.009</b>     |

\*In bold statistically significant results

<sup>a</sup>Some data for each pathologic characteristic are not available

Abbreviations: IBD: Inflammatory bowel diseases; PP: Paradoxical psoriasis.

**Table S2:** Distribution of psoriatic patients with and without PP according to genotype frequencies of the six SNPs analyzed.

| Gene            | SNP               | Genotype   | Psoriatic patients with PP (n=23) | Psoriatic patients without PP (n=70) | p value* |
|-----------------|-------------------|------------|-----------------------------------|--------------------------------------|----------|
|                 |                   |            | n (%)                             | n (%)                                |          |
| <b>HLA-Cw06</b> | <b>rs10484554</b> | C/C        | 9 (39.1%)                         | 27 (38.6%)                           | 0.7      |
|                 |                   | C/T        | 9 (39.1%)                         | 33 (47.1%)                           |          |
|                 |                   | T/T        | 5 (21.7%)                         | 10 (14.3%)                           |          |
|                 |                   | Per-allele | OR 1.1 (95%CI 0.6-2.2) p=0.7      |                                      |          |
| <b>IL23R</b>    | <b>rs11209026</b> | G/G        | 22 (95.6%)                        | 60 (85.7%)                           | 0.2      |
|                 |                   | G/A        | 1 (4.4%)                          | 10 (14.3%)                           |          |
|                 |                   | A/A        | 0 (0.0%)                          | 0 (0.0%)                             |          |
|                 |                   | Per-allele | OR 0.3 (95%CI 0.03-2.3) p=0.2     |                                      |          |
| <b>IL23R</b>    | <b>rs10789229</b> | T/T        | 11 (47.8%)                        | 29 (41.4%)                           | 0.7      |
|                 |                   | T/C        | 8 (34.8%)                         | 31 (44.3%)                           |          |
|                 |                   | C/C        | 4 (17.4%)                         | 10 (14.3%)                           |          |
|                 |                   | Per-allele | OR 0.9 (95%CI 0.5-1.8) P=0.8      |                                      |          |
| <b>TNFA</b>     | <b>rs1799964</b>  | T/T        | 13 (56.5%)                        | 42 (60.0%)                           | 0.2      |
|                 |                   | T/C        | 7 (30.4%)                         | 26 (37.1%)                           |          |
|                 |                   | C/C        | 3 (13.0%)                         | 2 (2.9%)                             |          |
|                 |                   | Per-allele | OR 1.4 (95% CI 0.7-3.1) p=0.3     |                                      |          |
| <b>TNFA</b>     | <b>rs1800629</b>  | G/G        | 21 (91.3%)                        | 64 (91.4%)                           | 0.6      |
|                 |                   | G/A        | 1 (4.4%)                          | 5 (7.1%)                             |          |
|                 |                   | A/A        | 1 (4.3%)                          | 1 (1.4%)                             |          |
|                 |                   | Per-allele | OR 1.2 (95% CI 0.4-4) p=0.7       |                                      |          |
| <b>IFIH1</b>    | <b>rs1990760</b>  | T/T        | 8 (34.8%)                         | 24 (34.3%)                           | 0.7      |
|                 |                   | T/C        | 11 (47.8%)                        | 28 (40.0%)                           |          |
|                 |                   | C/C        | 4 (17.4%)                         | 18 (25.7%)                           |          |
|                 |                   | Per-allele | OR 0.8 (95% CI 0.5-1.6) p=0.6     |                                      |          |

\*In bold statistically significant results

Abbreviations: PP: Paradoxical psoriasis; IFIH1: Interferon induced with helicase C domain 1; TNF- $\alpha$ : Tumor necrosis factor-alpha.

**Table S3:** Distribution of IBD patients with PP and psoriatic patients without PP treated with Adalimumab according to genotype frequencies of the six SNPs analyzed.

| Gene            | SNP               | Genotype   | IBD patients with PP<br>(n=11)         | Psoriatic patients without PP<br>(n=70) | p value*    |
|-----------------|-------------------|------------|----------------------------------------|-----------------------------------------|-------------|
|                 |                   |            | N (%)                                  | N (%)                                   |             |
| <i>HLA-Cw06</i> | <b>rs10484554</b> | C/C        | 9 (81.8%)                              | 27 (38.6%)                              | <b>0.02</b> |
|                 |                   | C/T        | 2 (18.2%)                              | 33 (47.1%)                              |             |
|                 |                   | T/T        | 0 (0.0%)                               | 10 (14.3%)                              |             |
|                 |                   | Per-allele | OR 0.2 (95% CI 0.04-0.7) <b>p=0.02</b> |                                         |             |
| <i>IL23R</i>    | <b>rs11209026</b> | G/G        | 9 (81.8%)                              | 60 (85.7%)                              | 0.73        |
|                 |                   | G/A        | 2 (18.2%)                              | 10 (14.3%)                              |             |
|                 |                   | A/A        | 0 (0.0%)                               | 0 (0.0%)                                |             |
|                 |                   | Per-allele | OR 1.33 (95% CI 0.3-7.1) p=0.7         |                                         |             |
| <i>IL23R</i>    | <b>rs10789229</b> | T/T        | 8 (72.7%)                              | 29 (41.4%)                              | <b>0.02</b> |
|                 |                   | T/C        | 0 (0.0%)                               | 31 (44.3%)                              |             |
|                 |                   | C/C        | 3 (27.3%)                              | 10 (14.3%)                              |             |
|                 |                   | Per-allele | OR 0.7 (95% CI 0.3-1.8) p=0.4          |                                         |             |
| <i>TNFA</i>     | <b>rs1799964</b>  | T/T        | 4 (36.4%)                              | 42 (60.0%)                              | 0.06        |
|                 |                   | T/C        | 5 (45.5%)                              | 26 (37.1%)                              |             |
|                 |                   | C/C        | 2 (18.1%)                              | 2 (2.9%)                                |             |
|                 |                   | Per-allele | OR 2.8 (95% CI 1-7.7) <b>p=0.05</b>    |                                         |             |
| <i>TNFA</i>     | <b>rs1800629</b>  | G/G        | 11 (100%)                              | 64 (91.4%)                              | 0.6         |
|                 |                   | G/A        | 0 (0.0%)                               | 5 (7.1%)                                |             |
|                 |                   | A/A        | 0 (0.0%)                               | 1 (1.4%)                                |             |
|                 |                   | Per-allele | -                                      |                                         |             |
| <i>IFIH1</i>    | <b>rs1990760</b>  | T/T        | 4 (36.3%)                              | 24 (34.3%)                              | 0.8         |
|                 |                   | T/C        | 5 (45.5%)                              | 28 (40.0%)                              |             |
|                 |                   | C/C        | 2 (18.2%)                              | 18 (25.7%)                              |             |
|                 |                   | Per-allele | OR 0.8 (95% CI 0.4-2) p= 0.7           |                                         |             |

\*In bold statistically significant results

Abbreviations: IBD: Inflammatory bowel diseases; PP: Paradoxical psoriasis; IFIH1: Interferon induced with helicase C domain 1; TNF- $\alpha$ : Tumor necrosis factor-alpha.
